# Supplementary material for: Minimal mRNA uptake and inflammatory response to COVID-19 mRNA vaccine exposure in human placental explants
Source: PubMed Central journal article supplement (PMC9915836; doi:10.1101/2023.02.01.23285349), 2023-02-02
Supplement: NIHPP2023.02.01.23285349v1-supplement-1.pdf [file NIHPP2023.02.01.23285349v1-supplement-1.pdf]

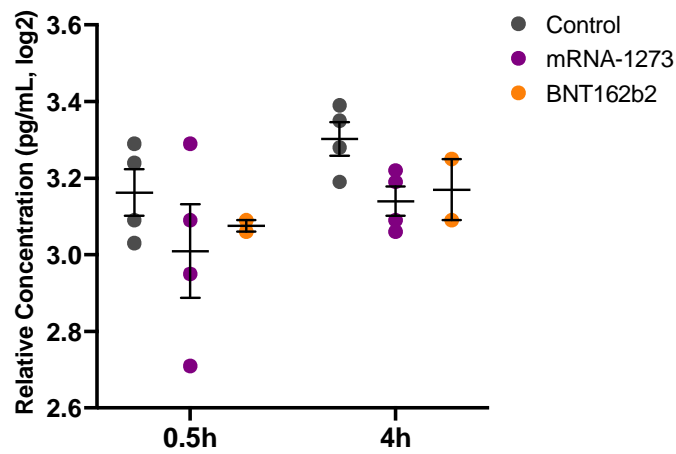

**Supplemental Figure 1.** Expression of IL-23 in conditioned media of placental explants incubated with COVID mRNA vaccines.
